# Supplementary material for: Patient-Reported Sexual Function, Bladder Function and Quality of Life for Patients with Low Rectal Cancers with or without a Permanent Ostomy
Source: MDPI journal article supplement (doi:10.3390/cancers16010153), 2023-12-28

Supplemental Materials:

**Supplemental Table S1.** Characteristics of the study population

| Characteristic                           | Presence of Ostomy  |                      |                          |
|------------------------------------------|---------------------|----------------------|--------------------------|
|                                          | No ( <i>n</i> = 25) | Yes ( <i>n</i> = 22) | Overall ( <i>n</i> = 47) |
| <b>Sex</b>                               |                     |                      |                          |
| Female                                   | 7 (28.0%)           | 9 (40.9%)            | 16 (34.0%)               |
| Male                                     | 18 (72.0%)          | 13 (59.1%)           | 31 (66.0%)               |
| <b>Race</b>                              |                     |                      |                          |
| Asian                                    | 2 (8.0%)            | 0 (0%)               | 2 (4.3%)                 |
| Black                                    | 2 (8.0%)            | 3 (13.6%)            | 5 (10.6%)                |
| White                                    | 21 (84.0%)          | 19 (86.4%)           | 40 (85.1%)               |
| <b>Ethnicity</b>                         |                     |                      |                          |
| Hispanic                                 | 3 (12.0%)           | 6 (27.3%)            | 9 (19.1%)                |
| Non-Hispanic                             | 22 (88.0%)          | 16 (72.7%)           | 38 (80.9%)               |
| <b>BMI</b>                               |                     |                      |                          |
| Mean (SD)                                | 29.5 (6.19)         | 30.0 (5.72)          | 29.7 (5.91)              |
| Median [Q1, Q3]                          | 29.6 [24, 33.6]     | 28.8 [25.6, 32.7]    | 29.3 [25.2, 33.2]        |
| <b>Clinical T Stage</b>                  |                     |                      |                          |
| 1                                        | 0                   | 0                    | 0                        |
| 2                                        | 4 (16.0%)           | 3 (13.6%)            | 7 (14.9%)                |
| 3                                        | 19 (76.0%)          | 14 (63.6%)           | 33 (70.2%)               |
| 4                                        | 2 (8.0%)            | 5 (22.7%)            | 7 (14.9%)                |
| <b>Clinical N Stage</b>                  |                     |                      |                          |
| 0                                        | 9 (36.0%)           | 1 (4.5%)             | 10 (21.3%)               |
| 1                                        | 11 (44.0%)          | 15 (68.2%)           | 26 (55.3%)               |
| 2                                        | 5 (20.0%)           | 6 (27.3%)            | 11 (23.4%)               |
| <b>Distance from the Anal Verge (cm)</b> |                     |                      |                          |
| Mean (SD)                                | 3.45 (1.49)         | 3.40 (2.58)          | 3.43 (2.05)              |
| Median [Q1, Q3]                          | 3.5 [2.25, 5]       | 2.75 [2, 4.3]        | 3 [2, 5]                 |
| <b>EMVI</b>                              |                     |                      |                          |
| No                                       | 17 (68.0%)          | 12 (54.5%)           | 29 (61.7%)               |
| Yes                                      | 8 (32.0%)           | 10 (45.5%)           | 18 (38.3%)               |
| <b>RT Technique</b>                      |                     |                      |                          |
| 3DCRT                                    | 16 (64.0%)          | 13 (59.1%)           | 29 (61.7%)               |
| VMAT                                     | 9 (36.0%)           | 9 (40.9%)            | 18 (38.3%)               |
| <b>RT Course</b>                         |                     |                      |                          |
| LCRT                                     | 18 (72.0%)          | 19 (86.4%)           | 37 (78.7%)               |
| SCRT                                     | 7 (28.0%)           | 3 (13.6%)            | 10 (21.3%)               |
| <b>Year of RT Completion</b>             |                     |                      |                          |
| 2017                                     | 6 (24.0%)           | 7 (31.8%)            | 13 (27.7%)               |
| 2018                                     | 6 (24.0%)           | 4 (18.2%)            | 10 (21.3%)               |
| 2019                                     | 5 (20.5%)           | 5 (22.7%)            | 10 (21.3%)               |

|                                        |            |            |            |
|----------------------------------------|------------|------------|------------|
| 2020 and later                         | 8 (32.0%)  | 6 (27.3%)  | 14 (29.8%) |
| <b>Surgery</b>                         |            |            |            |
| No                                     | 13 (52.0%) | 0 (0%)     | 13 (27.7%) |
| Yes                                    | 12 (48.0%) | 22 (100%)  | 34 (72.3%) |
| <b>Sexually Active In last 30 days</b> |            |            |            |
| No                                     | 7 (28.0%)  | 8 (36.4%)  | 15 (31.9%) |
| Yes                                    | 16 (64.0%) | 13 (59.1%) | 29 (61.7%) |
| Unknown/No response                    | 2 (8.0%)   | 1 (4.5%)   | 3 (6.4%)   |

**Supplemental Figure S1.** Sexual (IIEF, FSFI) and urinary (MLUTS, FLUTS) patient-reported outcomes, with results displayed separately according to presence of an ostomy.

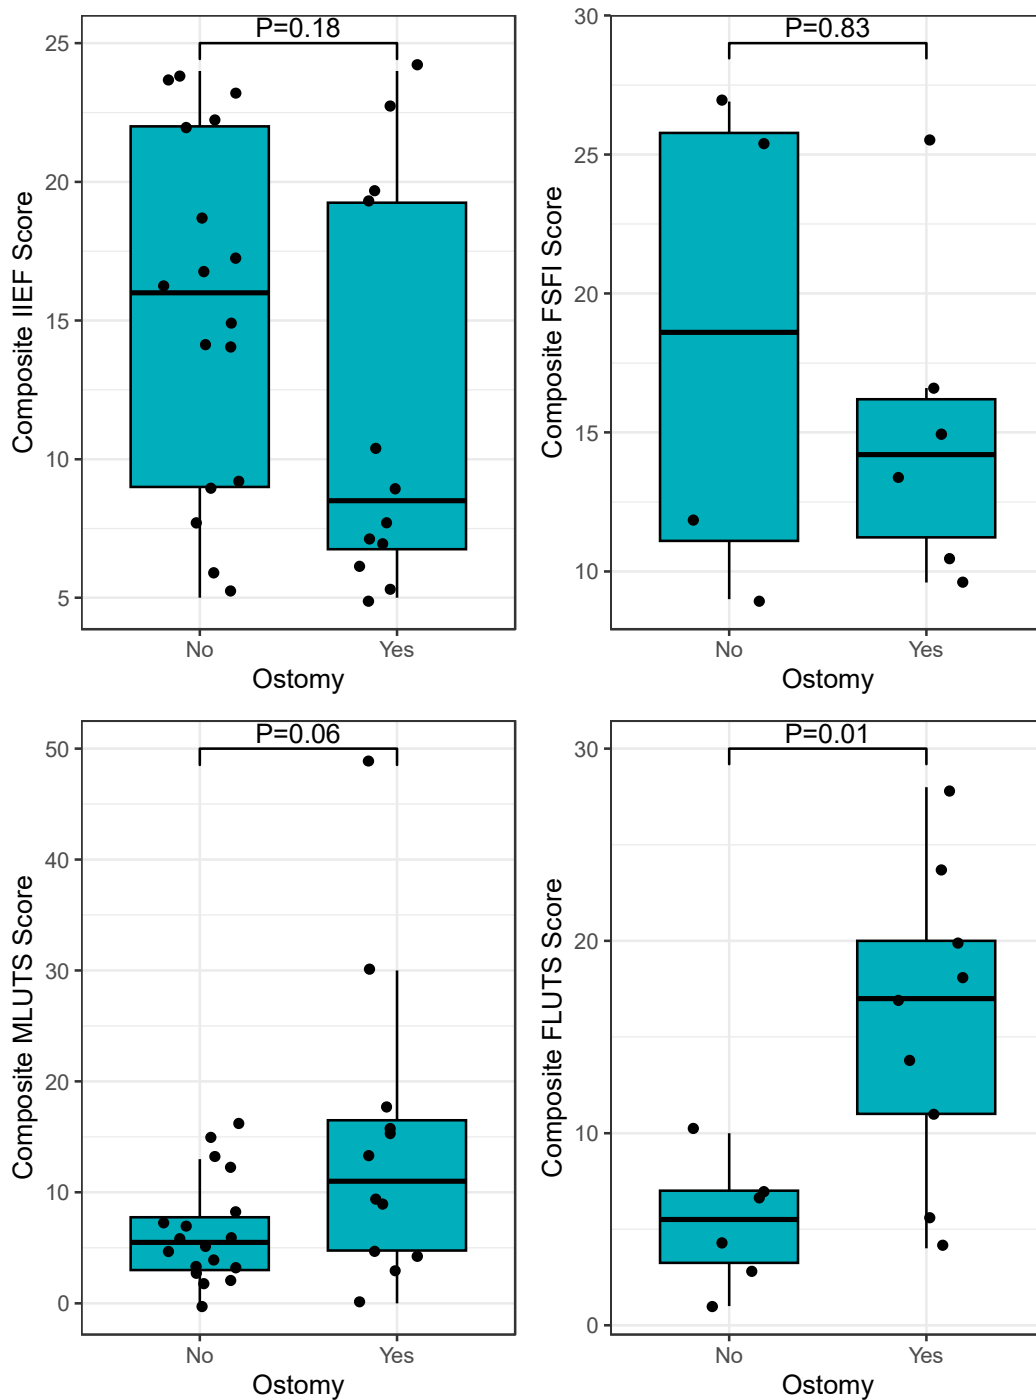

Supplement: s1 [file s1]
